# Supplementary material for: Diversity of PBI-DdeI satellite DNA in snakes correlates with rapid independent evolution and different functional roles
Source: PubMed Central journal article supplement (PMC6820872; doi:10.1038/s41598-019-51863-w), 2019-10-29
Supplement: 41598_2019_51863_MOESM1_ESM.pdf [file 41598_2019_51863_MOESM1_ESM.pdf]

1 **Diversity of PBI-DdeI satellite DNA in snakes correlates with rapid independent**  
2 **evolution and different functional roles**

3

4 Running title: Diversity of satellite DNA in snakes

5

6 Ratchaphol Thongchum<sup>1,2,3+</sup>, Worapong Singchat<sup>1,3+</sup>, Nararat Laopichienpong<sup>1,3</sup>, Panupong  
7 Tawichasri<sup>1,3</sup>, Ekaphan Kraichak<sup>4</sup>, Ornjira Prakhongcheep<sup>1</sup>, Siwapech Sillapaprayoon<sup>1,3</sup>,  
8 Narongrit Muangmai<sup>5</sup>, Sudarath Baicharoen<sup>6</sup>, Sunutcha Suntrarachun<sup>7</sup>, Lawan Chanhome<sup>7</sup>,  
9 Surin Peyachoknagul<sup>1</sup>, and Kornorn Srikulnath<sup>1,3,8,9,10\*</sup>

10 +These authors are joint first authors.

11

12 <sup>1</sup>Laboratory of Animal Cytogenetics and Comparative Genomics (ACCG), Department of  
13 Genetics, Faculty of Science, Kasetsart University, Bangkok 10900, Thailand

14 <sup>2</sup>Interdisciplinary Program in Genetic Engineering, Graduate School, Kasetsart University,  
15 Bangkok 10903, Thailand

16 <sup>3</sup>Special Research Unit for Wildlife Genomics, Department of Forest Biology, Faculty of  
17 Forestry, Kasetsart University, Chatuchak, Bangkok 10900, Thailand

18 <sup>4</sup>Department of Botany, Faculty of Science, Kasetsart University, Bangkok 10900, Thailand

19 <sup>5</sup>Department of Fishery Biology, Faculty of Fisheries, Kasetsart University, Bangkok 10900,  
20 Thailand

21 <sup>6</sup>Bureau of Conservation and Research, Zoological Park Organization under the Royal  
22 Patronage of His Majesty the King, Bangkok 10300, Thailand

23 <sup>7</sup>Queen Saovabha Memorial Institute, The Thai Red Cross Society, Bangkok 10330, Thailand

24 <sup>8</sup>Center for Advanced Studies in Tropical Natural Resources, National Research University-  
25 Kasetsart University, Kasetsart University, Bangkok 10900, Thailand (CASTNAR, NRU-KU,  
26 Thailand)

27 <sup>9</sup>Center of Excellence on Agricultural Biotechnology (AG-BIO/PERDO-CHE), Bangkok  
28 10900, Thailand

29 <sup>10</sup>Omics Center for Agriculture, Bioresources, Food and Health, Kasetsart University  
30 (OmiKU), Bangkok 10900, Thailand

31 \*Corresponding author: kornsorn.s@ku.ac.th

32

33

34 **Supplementary Information**

35 **Supplementary Table S1** Summary of repeat units and subfamilies in each species.

36 **Supplementary Table S2** Evolutionary rate of PBI-DdeI satellite DNA in the snake species  
37 studied.

38 **Supplementary Table S3** Pairwise comparison of PBI-DdeI satellite DNA sequence  
39 divergences among fifteen snake species. Species abbreviations were retrieved from  
40 Supplementary Table S8.

41 **Supplementary Table S4** AMOVA analysis of PBI-DdeI satellite DNA family within and  
42 between species.

43 **Supplementary Table S5** Summary of nucleotide diversity and haplotype diversity in each  
44 PBI-DdeI satellite DNA subfamily.

45 **Supplementary Table S6** AMOVA analysis of PBI-DdeI satellite DNA families within and  
46 between subfamilies.

47 **Supplementary Table S7** Summary of PBI-DdeI satellite DNA copy number estimates for the  
48 snake species studied.

49 **Supplementary Table S8** Summary of the snake species studied.

50 **Supplementary Fig. S1** Dot-blot hybridization patterns of PBI-DdeI satellite DNA.  
51 Hybridization membranes probed with PBI-DdeI derived from *Python bivittatus* (a) and  
52 representation of their genomic DNA distribution (b). Genomic DNA of 40 snake species were  
53 used (Supplementary Table S8). Cloned PBI-DdeIs were used as a control.

54 **Supplementary Fig. S2** Agarose gel electrophoresis of PCR products of PBI-DdeI satellite  
55 DNA in five snake species (*Python bivittatus*, *Epicrates maurus*, *Naja siamensis*, *Xenopeltis*  
56 *unicolor*, and *Ahaetulla prasina*). Molecular size of DNA is indicated in the left lane using VC  
57 DNA ladder mix (Vivantis Technologies Sdn Bhd, Selangor Darul Ehsan, Malaysia).

58 **Supplementary Fig. S3** Multiple alignment of all PBI-DdeI satellite DNA (satDNA)  
59 sequences from the consensus sequences of each species. PBI-DdeI satDNA sequences of  
60 fifteen species were used. SF indicates satDNA subfamily. Nucleotide sites occupied by a  
61 nucleotide in the consensus sequence are indicated by dots. Nucleotide sites containing  
62 different nucleotides are shown as the respective nucleotide observed. The hyphen indicates  
63 the absence of a nucleotide at that position.

64 **Supplementary Fig. S4** Secondary structures of PBI-DdeI satellite DNA (satDNA) sequence  
65 of fifteen snake species formed using RNAfold web server ([http://rna.tbi.univie.ac.at/cgi-](http://rna.tbi.univie.ac.at/cgi-bin/RNAWebSuite/RNAfold.cgi)  
66 [bin/RNAWebSuite/RNAfold.cgi](http://rna.tbi.univie.ac.at/cgi-bin/RNAWebSuite/RNAfold.cgi)). The PBI-DdeI satDNA sequences of fifteen species were

67 used. SF indicates satDNA subfamily. Species abbreviations were retrieved from  
68 Supplementary Table S8.

69 **Supplementary Fig. S5** Multiple alignment of all PBI-DdeI satellite DNA (satDNA)  
70 sequences from the consensus sequences of each satDNA subfamily. SF indicates satDNA  
71 subfamily. Nucleotide sites occupied by nucleotides in the consensus sequence are indicated  
72 by dots. Nucleotide sites containing different nucleotides are shown as the respective  
73 nucleotide observed. A hyphen indicates the absence of a nucleotide at that position.

74 **Supplementary Fig. S6** Statistical parsimony network of PBI-DdeI satellite DNA subfamily  
75 I, constructed from all sequence units of *Xenopeltis unicolor* (XUN), *Python bivittatus* (PBI),  
76 *Naja kaouthia* (NKA), *Naja siamensis* (NSI), *Epicrates maurus* (EMA), and *Ahaetulla prasina*  
77 (APR).

78 **Supplementary Fig. S7** Statistical parsimony network of PBI-DdeI satellite DNA subfamily  
79 II, constructed from all sequence units of *Epicrates maurus* (EMA), *Eunectes murinus* (EMU),  
80 *Ahaetulla prasina* (APR), *Boa constrictor imperator* (BCO), *Crotalus oreganus helleri*  
81 (CORE), and *Leioheterodon madagascariensis* (LMA).

82 **Supplementary Fig. S8** Statistical parsimony network of PBI-DdeI satellite DNA subfamily  
83 III, constructed from all sequence units of *Coelognathus radiatus* (CRA), *Ophiophagus hannah*  
84 (OHA), *Epicrates cenchria cenchria* (ECE), *Acrochordus javanicus* (AJA), *Enhydryis enhydryis*  
85 (EEN), and *Ahaetulla prasina* (APR).

86 **Supplementary Fig. S9** Southern blot hybridization probed with PBI-DdeI satellite DNA  
87 sequences derived from *Python bivittatus* (a), *Naja kaouthia* (b) and *Ophiophagus hannah* (c).  
88 (a) Hybridization membrane probed with PBI-DdeI satellite DNA sequences derived from *P.*  
89 *bivittatus* to male and female genomic DNA of *P. bivittatus*, *N. kaouthia*, and *O. hannah*. (b)  
90 Hybridization membrane probed with PBI-DdeI satellite DNA sequences derived from *N.*  
91 *kaouthia* to male and female genomic DNA of *P. bivittatus*, *N. kaouthia*, and *O. hannah*. (c)  
92 Hybridization membrane probed with PBI-DdeI satellite DNA sequences derived from *O.*  
93 *hannah* to male and female genomic DNA of *P. bivittatus*, *N. kaouthia*, and *O. hannah*. M,  
94 male F, female

95 **Supplementary Fig. S10** Copy number quantification of PBI-DdeI satellite DNA in fifteen  
96 different genomic snake species. Different colored dots and lines indicate different snake  
97 species. Error bars represent standard deviations.

98 **Supplementary Fig. S11** Spearman's correlation of AT%, size, copy number (absolute  
99 quantification and relative quantification), and intraspecific nucleotide diversity of PBI-DdeI  
100 satellite DNA (satDNA) sequence from fifteen snake species. Spearman's correlation tests

101 were performed among variables. The lower triangular matrix represents scatter plots of the  
102 different scores while the upper triangular matrix displays the corresponding Pearson  
103 correlation coefficients.

104 **Supplementary Fig. S12** Copy number quantification of PBI-DdeI satellite DNA between  
105 male (n = 10) and female (n = 10) genomes of *Naja kaouthia*. Error bars represent standard  
106 deviations.

107 **Supplementary Fig. S13** The standard calibration curve used in the absolute quantification of  
108 copy number of PBI-DdeI satellite DNA. The linear dynamic range extended from 0.00025 to  
109 25.00 ng/μl of plasmid DNA with the PBI-DdeI clone concentration from *Naja kaouthia* with  
110 six different concentrations. Regression lines were calculated as  $R^2 = 0.984$ ,  $p < 0.001$ .

111

112

113

114

115

116

117

118

119

120

Supplementary Table S1. Summary of repeat units and subfamilies in each species

| Species                               | Subfamily <sup>1</sup> | Unit                                                                              |
|---------------------------------------|------------------------|-----------------------------------------------------------------------------------|
| <i>Python bivittatus</i>              | SFI                    | PBI-C3U3, PBI-C4U4, PBI-C1U5, PBI-C2U6                                            |
| <i>Xenopeltis unicolor</i>            | SFI                    | XUN-C1U1, XUN-C1U2, XUN-C2U3, XUN-C2U4, XUN-C3U5                                  |
| <i>Naja kaouthia</i>                  | SFI                    | NKA-C1U1, NKA-C2U2, NKA-C2U3, NKA-C3U4, NKA-C4U5,<br>NKA-C1U6, NKA-C2U7           |
| <i>Naja siamensis</i>                 | SFI                    | NSI-C1U1, NSI-C2U2, NSI-C2U3, NSI-C3U4, NSI-C3U5,<br>NSI-C1U6, NSI-C1U7, NSI-C2U8 |
| <i>Ahaetulla prasina</i>              | SFI                    | APR-C1U1, , APR-C4U4, APR-C4U9                                                    |
| <i>Epicrates maurus</i>               | SFI                    | EMA-C1U2, EMA-C2U4, EMA-C3U6, EMA-C1U9                                            |
| <i>Eunectes murinus</i>               | SFII                   | EMU-C1U1, EMU-C1U2, EMU-C2U3, EMU-C2U4, EMU-C3U5                                  |
| <i>Boa constrictor imperator</i>      | SFII                   | BCO-C1U1, BCO-C2U2, BCO-C2U3, BCO-C3U4, BCO-C3U5                                  |
| <i>Leioheterodon madagascariensis</i> | SFII                   | LMA-C1U1, LMA-C1U2, LMA-C2U3, LMA-C1U4, LMA-C1U5, LMA-C2U6,                       |
| <i>Crotalus oreganus helleri</i>      | SFII                   | CORE-C1U1, CORE-C2U2, CORE-C2U3, CORE-C3U4                                        |
| <i>Ahaetulla prasina</i>              | SFII                   | APR-C2U2, APR-C3U3, APR-C4U8                                                      |
| <i>Epicrates maurus</i>               | SFII                   | EMA-C1U1, EMA-C2U3, EMA-C3U5, EMA-C4U7, EMA-C1U8, EMA-C2U10, EMA-C3U11            |
| <i>Epicrates cenchria cenchria</i>    | SFIII                  | ECE-C1U1, ECE-C2U2, ECE-C3U3                                                      |
| <i>Ophiophagus hannah</i>             | SFIII                  | OHA-C1U1, OHA-C1U2, OHA-C2U3, OHA-C1U4, OHA-C2U5,<br>OHA-C2U6, OHAC3U7, OHA-C4U8, |
| <i>Ahaetulla prasina</i>              | SFIII                  | APR-C1U5, APR-C2U6, APR-C3U7                                                      |
| <i>Acrochordus javanicus</i>          | SFIII                  | AJA-C1U1, AJA-C2U2, AJA-C3U3, AJA-C4U4, AJA-C1U5,<br>AJA-C2U6, AJA-C3U7, AJA-C4U8 |
| <i>Enhydryis enhydryis</i>            | SFIII                  | EEN-C1U1, EEN-C2U2, EEN-C4U4, EEN-C1U5,<br>EEN-C2U6, EEN-C3U7, EEN-C4U8           |
| <i>Coelognathus radiatus</i>          | SFIII                  | CRA-C1U1, CRA-C1U2, CRA-C2U3, CRA-C1U4, CRA-C2U5,<br>CRA-C3U6, CRA-C4U7           |

<sup>1</sup>SF indicates PBI-DdeI satellite DNA subfamily

## Supplementary Tale S2 Evolutionary rate of PBI-DdeI satellite DNA in the snake species studied.

| Pair-wise comparison | Average net genetic distance |                             | Evolutionary rate |
|----------------------|------------------------------|-----------------------------|-------------------|
|                      | among groups                 | Divergence in million years |                   |
| XUN vs PBI           | 0.040±0.013                  | 70.1                        | 0.056             |
| XUN vs NKA           | 0.064±0.015                  | 108.7                       | 0.059             |
| XUN vs NSI           | 0.086±0.017                  | 108.7                       | 0.079             |
| XUN vs APR           | 0.058±0.011                  | 108.7                       | 0.053             |
| XUN vs EMA           | 0.089±0.018                  | 96.9                        | 0.092             |
| XUN vs EMU           | 0.053±0.015                  | 96.9                        | 0.055             |
| XUN vs BCO           | 0.062±0.016                  | 96.9                        | 0.064             |
| XUN vs CORE          | 0.061±0.017                  | 108.7                       | 0.056             |
| XUN vs AJA           | 0.109±0.022                  | 108.7                       | 0.100             |
| XUN vs LMA           | 0.066±0.017                  | 108.7                       | 0.061             |
| XUN vs CRA           | 0.124±0.023                  | 108.7                       | 0.114             |
| XUN vs OHA           | 0.091±0.018                  | 108.7                       | 0.084             |
| XUN vs ECE           | 0.103±0.022                  | 96.9                        | 0.106             |
| XUN vs EEN           | 0.106±0.022                  | 108.7                       | 0.097             |
| PBI vs NKA           | 0.052±0.014                  | 108.7                       | 0.048             |
| PBI vs NSI           | 0.079±0.017                  | 108.7                       | 0.073             |
| PBI vs APR           | 0.069±0.013                  | 108.7                       | 0.063             |
| PBI vs EMA           | 0.107±0.020                  | 96.9                        | 0.111             |
| PBI vs EMU           | 0.075±0.018                  | 96.9                        | 0.077             |
| PBI vs BCO           | 0.077±0.018                  | 96.9                        | 0.079             |
| PBI vs CORE          | 0.076±0.018                  | 108.7                       | 0.070             |
| PBI vs AJA           | 0.097±0.021                  | 108.7                       | 0.089             |
| PBI vs LMA           | 0.082±0.019                  | 108.7                       | 0.075             |
| PBI vs CRA           | 0.118±0.023                  | 108.7                       | 0.108             |
| PBI vs OHA           | 0.085±0.017                  | 108.7                       | 0.078             |
| PBI vs ECE           | 0.102±0.022                  | 96.9                        | 0.105             |
| PBI vs EEN           | 0.094±0.021                  | 108.9                       | 0.086             |
| NKA vs NSI           | 0.072±0.014                  | 41.5                        | 0.173             |
| NKA vs APR           | 0.073±0.013                  | 46.3                        | 0.158             |
| NKA vs EMA           | 0.102±0.019                  | 108.7                       | 0.094             |
| NKA vs EMU           | 0.075±0.017                  | 108.7                       | 0.069             |
| NKA vs BCO           | 0.077±0.017                  | 108.7                       | 0.071             |
| NKA vs CORE          | 0.076±0.017                  | 54.3                        | 0.140             |
| NKA vs AJA           | 0.079±0.018                  | 90.7                        | 0.087             |
| NKA vs LMA           | 0.082±0.017                  | 41.5                        | 0.198             |
| NKA vs CRA           | 0.092±0.019                  | 46.3                        | 0.200             |
| NKA vs OHA           | 0.072±0.015                  | 41.5                        | 0.174             |
| NKA vs ECE           | 0.089±0.020                  | 108.7                       | 0.082             |
| NKA vs EEN           | 0.076±0.018                  | 49.2                        | 0.155             |
| NSI vs APR           | 0.104±0.016                  | 46.3                        | 0.224             |
| NSI vs EMA           | 0.142±0.021                  | 108.7                       | 0.131             |
| NSI vs EMU           | 0.111±0.020                  | 108.7                       | 0.102             |
| NSI vs BCO           | 0.113±0.020                  | 108.7                       | 0.104             |
| NSI vs CORE          | 0.112±0.020                  | 54.3                        | 0.207             |
| NSI vs AJA           | 0.133±0.022                  | 90.7                        | 0.147             |
| NSI vs LMA           | 0.116±0.020                  | 41.5                        | 0.279             |
| NSI vs CRA           | 0.132±0.022                  | 46.3                        | 0.286             |
| NSI vs OHA           | 0.108±0.018                  | 41.5                        | 0.261             |

| Pair-wise comparison | Average net genetic distance |                             | Evolutionary rate |
|----------------------|------------------------------|-----------------------------|-------------------|
|                      | among groups                 | Divergence in million years |                   |
| NSI vs ECE           | 0.124±0.023                  | 108.7                       | 0.114             |
| NSI vs EEN           | 0.130±0.022                  | 49.2                        | 0.264             |
| APR vs EMA           | 0.095±0.017                  | 108.7                       | 0.087             |
| APR vs EMU           | 0.048±0.009                  | 108.7                       | 0.044             |
| APR vs BCO           | 0.050±0.009                  | 108.7                       | 0.046             |
| APR vs CORE          | 0.049±0.009                  | 54.3                        | 0.090             |
| APR vs AJA           | 0.105±0.019                  | 90.7                        | 0.116             |
| APR vs LMA           | 0.055±0.010                  | 46.3                        | 0.118             |
| APR vs CRA           | 0.111±0.019                  | 36.6                        | 0.302             |
| APR vs OHA           | 0.080±0.013                  | 46.3                        | 0.174             |
| APR vs ECE           | 0.090±0.017                  | 108.7                       | 0.083             |
| APR vs EEN           | 0.102±0.019                  | 49.2                        | 0.208             |
| EMA vs EMU           | 0.069±0.016                  | 96.9                        | 0.072             |
| EMA vs BCO           | 0.070±0.016                  | 96.9                        | 0.072             |
| EMA vs CORE          | 0.069±0.016                  | 108.7                       | 0.063             |
| EMA vs AJA           | 0.061±0.014                  | 108.7                       | 0.057             |
| EMA vs LMA           | 0.075±0.016                  | 108.7                       | 0.069             |
| EMA vs CRA           | 0.146±0.023                  | 108.7                       | 0.135             |
| EMA vs OHA           | 0.116±0.019                  | 108.7                       | 0.107             |
| EMA vs ECE           | 0.127±0.022                  | 96.9                        | 0.131             |
| EMA vs EEN           | 0.058±0.014                  | 108.7                       | 0.054             |
| EMU vs BCO           | 0.009±0.005                  | 96.9                        | 0.009             |
| EMU vs CORE          | 0.008±0.005                  | 108.7                       | 0.007             |
| EMU vs AJA           | 0.097±0.021                  | 108.7                       | 0.089             |
| EMU vs LMA           | 0.014±0.006                  | 108.7                       | 0.012             |
| EMU vs CRA           | 0.105±0.021                  | 108.7                       | 0.097             |
| EMU vs OHA           | 0.074±0.016                  | 108.7                       | 0.068             |
| EMU vs ECE           | 0.080±0.019                  | 96.9                        | 0.083             |
| EMU vs EEN           | 0.094±0.021                  | 108.7                       | 0.086             |
| BCO vs CORE          | 0.003±0.002                  | 108.7                       | 0.003             |
| BCO vs AJA           | 0.099±0.021                  | 108.7                       | 0.091             |
| BCO vs LMA           | 0.009±0.004                  | 108.7                       | 0.009             |
| BCO vs CRA           | 0.108±0.021                  | 108.7                       | 0.099             |
| BCO vs OHA           | 0.076±0.016                  | 108.7                       | 0.070             |
| BCO vs ECE           | 0.082±0.019                  | 96.9                        | 0.085             |
| BCO vs EEN           | 0.096±0.021                  | 108.7                       | 0.088             |
| CORE vs AJA          | 0.098±0.021                  | 90.7                        | 0.108             |
| CORE vs LMA          | 0.008±0.004                  | 54.3                        | 0.016             |
| CORE vs CRA          | 0.107±0.021                  | 54.3                        | 0.197             |
| CORE vs OHA          | 0.075±0.016                  | 54.3                        | 0.138             |
| CORE vs ECE          | 0.082±0.019                  | 108.7                       | 0.075             |
| CORE vs EEN          | 0.095±0.021                  | 54.3                        | 0.176             |
| AJA vs LMA           | 0.104±0.021                  | 90.7                        | 0.115             |
| AJA vs CRA           | 0.129±0.024                  | 90.7                        | 0.142             |
| AJA vs OHA           | 0.097±0.019                  | 90.7                        | 0.107             |
| AJA vs ECE           | 0.108±0.022                  | 108.7                       | 0.099             |
| AJA vs EEN           | 0.009±0.003                  | 90.7                        | 0.010             |
| LMA vs CRA           | 0.113±0.021                  | 46.3                        | 0.243             |
| LMA vs OHA           | 0.081±0.016                  | 46.3                        | 0.176             |

| Pair-wise comparison | Average net genetic distance |                             | Evolutionary rate |
|----------------------|------------------------------|-----------------------------|-------------------|
|                      | among groups                 | Divergence in million years |                   |
| LMA vs ECE           | 0.087±0.019                  | 108.7                       | 0.080             |
| LMA vs EEN           | 0.101±0.022                  | 49.2                        | 0.205             |
| CRA vs OHA           | 0.102±0.019                  | 46.3                        | 0.219             |
| CRA vs ECE           | 0.112±0.022                  | 108.7                       | 0.103             |
| CRA vs EEN           | 0.125±0.023                  | 49.2                        | 0.253             |
| OHA vs ECE           | 0.085±0.018                  | 108.7                       | 0.078             |
| OHA vs EEN           | 0.094±0.019                  | 49.2                        | 0.191             |
| ECE vs EEN           | 0.105±0.022                  | 108.7                       | 0.096             |



Supplementary Table S3. Pairwise comparison of PBI-DdeI satellite DNA sequence divergences among fifteen snake species. Species abbreviations were retrieved from Supplementary Table S8.

|      | XUN         | PBI         | NKA         | NSI         | APR         | EMA         | EMU         | BCI         | CORH        | AJA         | LMA         | CRA         | OHA         | ECE         | EEN |
|------|-------------|-------------|-------------|-------------|-------------|-------------|-------------|-------------|-------------|-------------|-------------|-------------|-------------|-------------|-----|
| XUN  |             |             |             |             |             |             |             |             |             |             |             |             |             |             |     |
| PBI  | 0.040±0.013 |             |             |             |             |             |             |             |             |             |             |             |             |             |     |
| NKA  | 0.064±0.015 | 0.052±0.014 |             |             |             |             |             |             |             |             |             |             |             |             |     |
| NSI  | 0.086±0.017 | 0.079±0.017 | 0.072±0.014 |             |             |             |             |             |             |             |             |             |             |             |     |
| APR  | 0.058±0.011 | 0.069±0.013 | 0.073±0.013 | 0.104±0.016 |             |             |             |             |             |             |             |             |             |             |     |
| EMA  | 0.089±0.018 | 0.107±0.020 | 0.102±0.019 | 0.142±0.021 | 0.095±0.017 |             |             |             |             |             |             |             |             |             |     |
| EMU  | 0.053±0.015 | 0.075±0.018 | 0.075±0.017 | 0.111±0.020 | 0.048±0.009 | 0.069±0.016 |             |             |             |             |             |             |             |             |     |
| BCI  | 0.062±0.016 | 0.077±0.018 | 0.077±0.017 | 0.113±0.020 | 0.050±0.009 | 0.070±0.016 | 0.009±0.005 |             |             |             |             |             |             |             |     |
| CORH | 0.061±0.017 | 0.076±0.018 | 0.076±0.017 | 0.112±0.020 | 0.049±0.009 | 0.069±0.016 | 0.008±0.005 | 0.003±0.002 |             |             |             |             |             |             |     |
| AJA  | 0.109±0.022 | 0.097±0.021 | 0.079±0.018 | 0.133±0.022 | 0.105±0.019 | 0.061±0.014 | 0.097±0.021 | 0.099±0.021 | 0.098±0.021 |             |             |             |             |             |     |
| LMA  | 0.066±0.017 | 0.082±0.019 | 0.082±0.017 | 0.116±0.020 | 0.055±0.010 | 0.075±0.016 | 0.014±0.006 | 0.009±0.004 | 0.008±0.004 | 0.104±0.021 |             |             |             |             |     |
| CRA  | 0.124±0.023 | 0.118±0.023 | 0.092±0.019 | 0.132±0.022 | 0.111±0.019 | 0.146±0.023 | 0.105±0.021 | 0.108±0.021 | 0.107±0.021 | 0.129±0.024 | 0.113±0.021 |             |             |             |     |
| OHA  | 0.091±0.018 | 0.085±0.017 | 0.072±0.015 | 0.108±0.018 | 0.080±0.013 | 0.116±0.019 | 0.074±0.016 | 0.076±0.016 | 0.075±0.016 | 0.097±0.019 | 0.081±0.016 | 0.102±0.019 |             |             |     |
| ECE  | 0.103±0.022 | 0.102±0.022 | 0.089±0.020 | 0.124±0.023 | 0.090±0.017 | 0.127±0.022 | 0.080±0.019 | 0.082±0.019 | 0.082±0.019 | 0.108±0.022 | 0.087±0.019 | 0.112±0.022 | 0.085±0.018 |             |     |
| EEN  | 0.106±0.022 | 0.094±0.021 | 0.076±0.018 | 0.130±0.022 | 0.102±0.019 | 0.058±0.014 | 0.094±0.021 | 0.096±0.021 | 0.095±0.021 | 0.009±0.003 | 0.101±0.022 | 0.125±0.023 | 0.094±0.019 | 0.105±0.022 |     |

Supplementary Table S4. AMOVA analysis of PBI-DdeI satellite DNA family within and between species

| Variation source                | d.f. | Sum of squares | Variance components | Percentage variation | $F_{st}$ |
|---------------------------------|------|----------------|---------------------|----------------------|----------|
| Among groups                    | 14   | 842.691        | 7.624               | 72.960               | 0.729*** |
| Among populations within groups | 35   | 84.678         | 0.323               | 3.090                | 0.114*** |
| Within populations              | 64   | 201.500        | 3.148               | 30.130               | 0.698*** |

\*\*\*  $p < 0.001$

Supplementary Table S5. Summary of nucleotide diversity and haplotype diversity in each PBI-DdeI satellite DNA subfamily

| Subfamily | n  | Nucleotide diversity ( $\pi$ ) | Haplotype diversity ( $h$ ) | Mean distance within group |
|-----------|----|--------------------------------|-----------------------------|----------------------------|
| I         | 31 | 0.061 $\pm$ 0.005              | 0.927 $\pm$ 0.025           | 0.082 $\pm$ 0.011          |
| II        | 30 | 0.026 $\pm$ 0.004              | 0.890 $\pm$ 0.052           | 0.051 $\pm$ 0.008          |
| III       | 36 | 0.057 $\pm$ 0.005              | 0.919 $\pm$ 0.031           | 0.085 $\pm$ 0.010          |

Number of monomeric sequenced repeats (n), nucleotide diversity ( $\pi$ )  $\pm$  *SD* of each repeated subfamily, haplotype diversity ( $h$ )  $\pm$  *SD* of each repeated subfamily and mean distance within each group  $\pm$  *SD* of repeated subfamily

Supplementary Table S6. AMOVA analysis of PBI-DdeI satellite DNA family within and between subfamilies

| Variation source                | d.f. | Sum of squares | Variance components | Percentage variation | $F_{st}$ |
|---------------------------------|------|----------------|---------------------|----------------------|----------|
| Among groups                    | 2    | 250.075        | 2.589               | 22.390               | 0.607*** |
| Among populations within groups | 12   | 459.642        | 5.450               | 47.120               | 0.695*** |
| Within populations              | 83   | 292.752        | 3.527               | 30.490               | 0.223*** |

\*\*\*  $p < 0.001$

Supplementary Table S7. Summary of PBI-DdeI satellite DNA copy number estimates for the snake species studied

| Species                               | n <sup>1</sup> | Unit length (bp) | Relative copy number (copy) | Absolute copy number (copy) | % Genomic proportion |
|---------------------------------------|----------------|------------------|-----------------------------|-----------------------------|----------------------|
| <i>Epicrates maurus</i>               | 11             | 196              | 1.93E+01                    | 8.30E-02                    | 1.20E-06             |
| <i>Xenopeltis unicolor</i>            | 5              | 209              | 4.25E+02                    | 2.80E-01                    | 4.04E-06             |
| <i>Python bivittatus</i>              | 4              | 209              | 3.99E+09                    | 5.73E+06                    | 8.25E+01             |
| <i>Acrochordus javanicus</i>          | 8              | 198              | 4.28E+02                    | 5.98E-01                    | 8.61E-06             |
| <i>Enhydris enhydris</i>              | 7              | 196              | 4.21E+02                    | 9.67E-02                    | 1.39E-06             |
| <i>Leioheterodon madagascariensis</i> | 6              | 194              | 2.80E+03                    | 7.77E-01                    | 1.12E-05             |
| <i>Naja kaouthia</i>                  | 7              | 208 – 209        | 3.52E+04                    | 1.11E+00                    | 1.61E-05             |
| <i>Naja siamensis</i>                 | 8              | 208 – 209        | 2.41E+03                    | 1.75E+00                    | 2.52E-05             |
| <i>Ophiophagus hannah</i>             | 8              | 208 – 209        | 6.34E+03                    | 2.77E+01                    | 3.99E-04             |
| <i>Ahaetulla prasina</i>              | 9              | 209              | 7.92E+04                    | 4.28E+00                    | 6.16E-05             |
| <i>Coelognathus radiatus</i>          | 7              | 209              | 4.44E+03                    | 1.90E+00                    | 2.74E-05             |
| <i>Eunectes murinus</i>               | 5              | 208 – 210        | 4.66E+02                    | 8.07E-01                    | 1.16E-05             |
| <i>Epicrates cenchria cenchria</i>    | 3              | 209              | 9.95E+01                    | 8.32E-01                    | 1.20E-05             |
| <i>Crotalus oreganus helleri</i>      | 4              | 195              | 4.34E+02                    | 2.68E+00                    | 3.86E-05             |
| <i>Boa constrictor imperator</i>      | 5              | 196              | 3.66E+01                    | 8.02E-01                    | 1.16E-05             |

<sup>1</sup>Number of monomeric repeats sequenced (n)

Supplementary Table S8. Summary of snake species studied

| Family                  | Species                            | Snake group               | Abbreviation | Number of animal used<br>(female + male) |       |
|-------------------------|------------------------------------|---------------------------|--------------|------------------------------------------|-------|
| Cylindrophiidae         | <i>Cylindrophis ruffus</i>         | Henophidia                | CRU          | 1 + 1                                    |       |
| Boidae                  | <i>Epicrates maurus</i>            | Henophidia                | EMA          | 0 + 1                                    |       |
|                         | <i>Eunectes murinus</i>            | Henophidia                | EMU          | 0 + 1                                    |       |
|                         | <i>Epicrates cenchria cenchria</i> | Henophidia                | ECE          | 0 + 1                                    |       |
|                         | <i>Boa constrictor imperator</i>   | Henophidia                | BCO          | 1 + 0                                    |       |
|                         | <i>Xenopeltis unicolor</i>         | Henophidia                | XUN          | 1 + 1                                    |       |
| Pythonidae              | <i>Python bivittatus</i>           | Henophidia                | PBI          | 1 + 1                                    |       |
| Acrochordidae           | <i>Acrochordus javanicus</i>       | Caenophidia               | AJA          | 1 + 1                                    |       |
| Viperidae               | <i>Daboia siamensis</i>            | Caenophidia               | DSI          | 1 + 1                                    |       |
|                         | <i>Cerastes cerastes</i>           | Caenophidia               | CCE          | 1 + 1                                    |       |
|                         | <i>Trimeresurus albolabris</i>     | Caenophidia               | TAL          | 0 + 1                                    |       |
|                         | <i>Crotalus oreganus helleri</i>   | Caenophidia               | CORE         | 0 + 1                                    |       |
|                         | <i>Crotalus durissus unicolor</i>  | Caenophidia               | CDU          | 1 + 0                                    |       |
|                         | <i>Crotalus horridus</i>           | Caenophidia               | CHO          | 0 + 1                                    |       |
|                         | <i>Bitis gabonica</i>              | Caenophidia               | BGA          | 1 + 0                                    |       |
|                         | Homalopsidae                       | <i>Homalopsis buccata</i> | Caenophidia  | HBU                                      | 1 + 1 |
|                         |                                    | <i>Enhydris enhydris</i>  | Caenophidia  | EEN                                      | 1 + 1 |
|                         | Lamprophiidae                      | <i>Leioheterodon</i>      | Caenophidia  | LMA                                      | 1 + 1 |
| <i>madagascariensis</i> |                                    |                           |              |                                          |       |
| Elapidae                | <i>Naja kaouthia</i>               | Caenophidia               | NKA          | 10 + 10                                  |       |
|                         | <i>Naja siamensis</i>              | Caenophidia               | NSI          | 1 + 1                                    |       |
|                         | <i>Ophiophagus hannah</i>          | Caenophidia               | OHA          | 1 + 1                                    |       |
|                         | <i>Bungarus candidus</i>           | Caenophidia               | BCA          | 1 + 1                                    |       |
|                         | <i>Bungarus flaviceps</i>          | Caenophidia               | BFL          | 1 + 1                                    |       |
| Colubridae              | <i>Oligodon fasciolatus</i>        | Caenophidia               | OFA          | 1 + 1                                    |       |
|                         | <i>Ahaetulla prasina</i>           | Caenophidia               | APR          | 1 + 1                                    |       |
|                         | <i>Boiga dendrophila</i>           | Caenophidia               | BDE          | 1 + 1                                    |       |
|                         | <i>Gonyosoma oxycephalum</i>       | Caenophidia               | GOX          | 1 + 1                                    |       |
|                         | <i>Coelognathus flavolineatus</i>  | Caenophidia               | CFL          | 1 + 1                                    |       |
|                         | <i>Xenochrophis flavipunctatus</i> | Caenophidia               | XFL          | 1 + 1                                    |       |
|                         | <i>Coelognathus radiatus</i>       | Caenophidia               | CRA          | 1 + 1                                    |       |
|                         | <i>Ptyas mucosa</i>                | Caenophidia               | PMU          | 1 + 1                                    |       |
|                         | <i>Pantherophis guttatus</i>       | Caenophidia               | PGU          | 1 + 1                                    |       |
|                         | <i>Boiga ocellata</i>              | Caenophidia               | BOC          | 0 + 1                                    |       |
|                         | <i>Boiga cyanea</i>                | Caenophidia               | BCYA         | 0 + 1                                    |       |
|                         | <i>Boiga cynodon</i>               | Caenophidia               | BCY          | 0 + 1                                    |       |
|                         | <i>Rhabdophis nigrocinctus</i>     | Caenophidia               | RNI          | 0 + 1                                    |       |
|                         | <i>Ahaetulla nasuta</i>            | Caenophidia               | ANA          | 1 + 0                                    |       |
|                         | <i>Chrysopelea paradisi</i>        | Caenophidia               | CPA          | 1 + 0                                    |       |
|                         | <i>Chrysopelea ornata</i>          | Caenophidia               | COR          | 1 + 0                                    |       |
|                         | <i>Gonyosoma prasinum</i>          | Caenophidia               | GPR          | 1 + 0                                    |       |

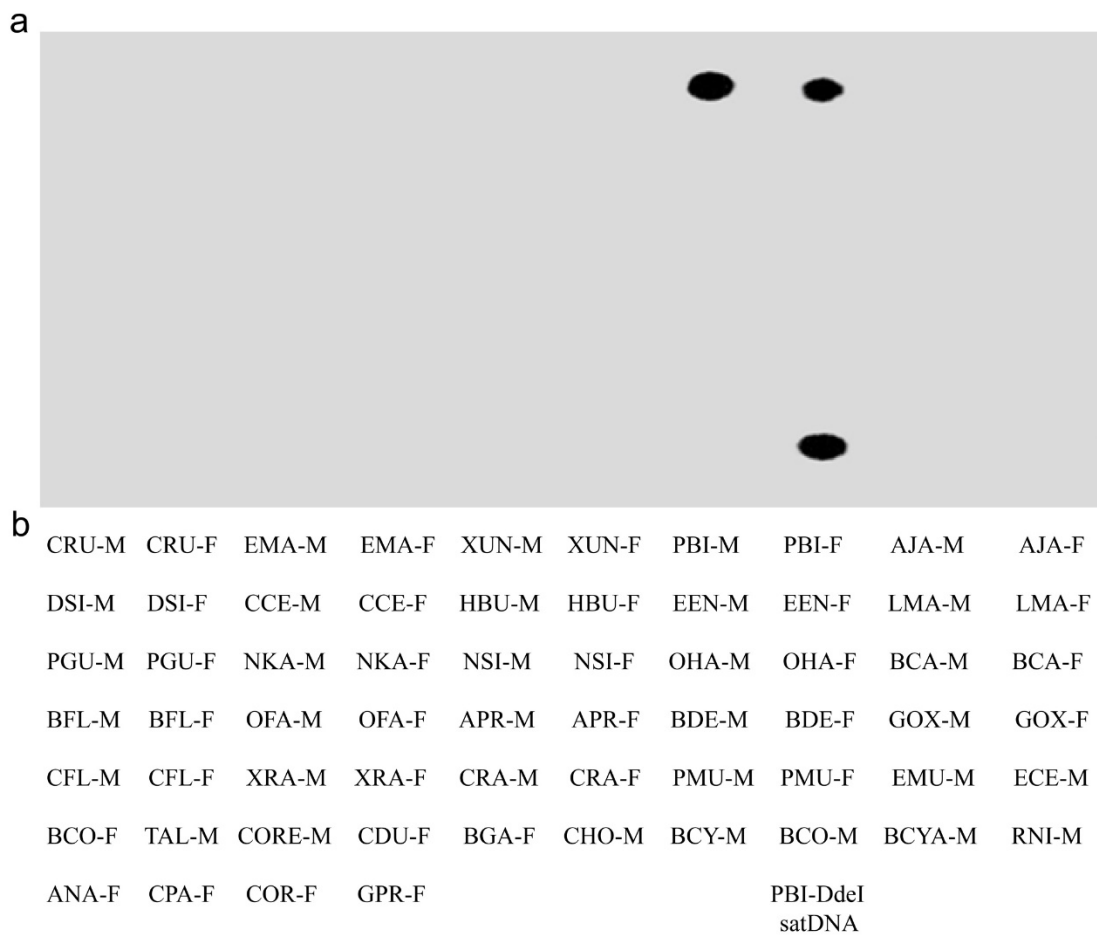

Supplementary Figure 1S (Thongchum et al.)

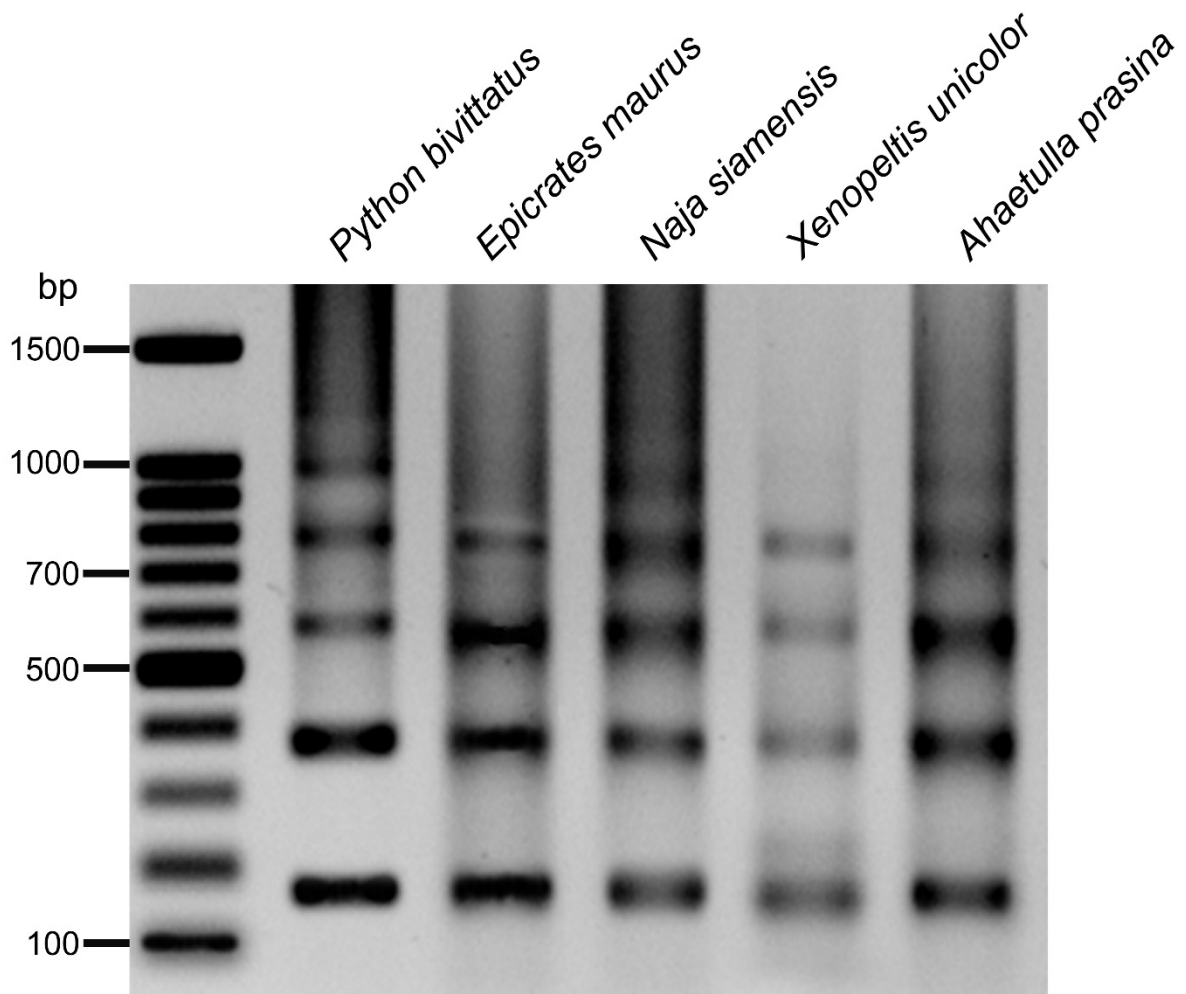

Supplementary Figure 2S (Thongchum et al.)



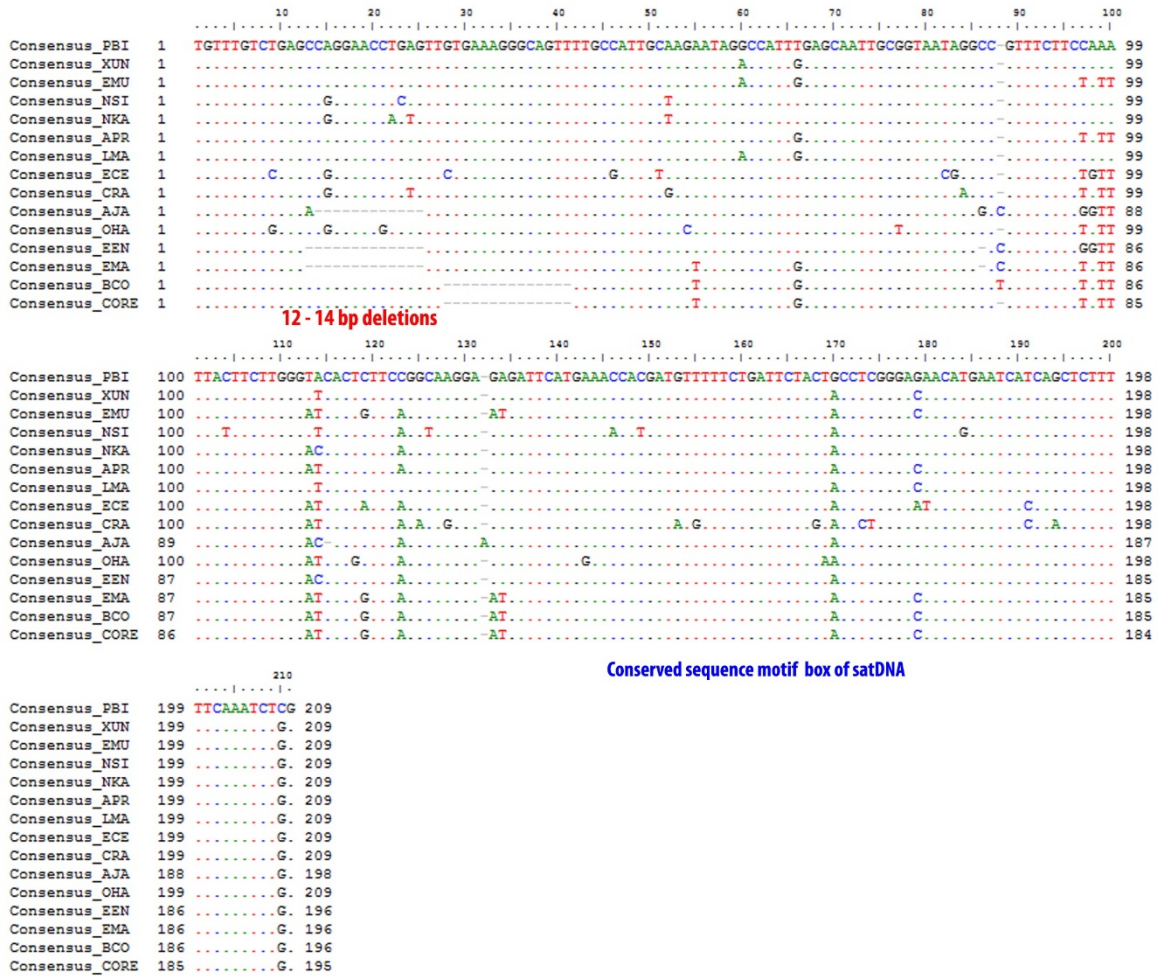

Supplementary Figure 3S (Thongchum et al.)

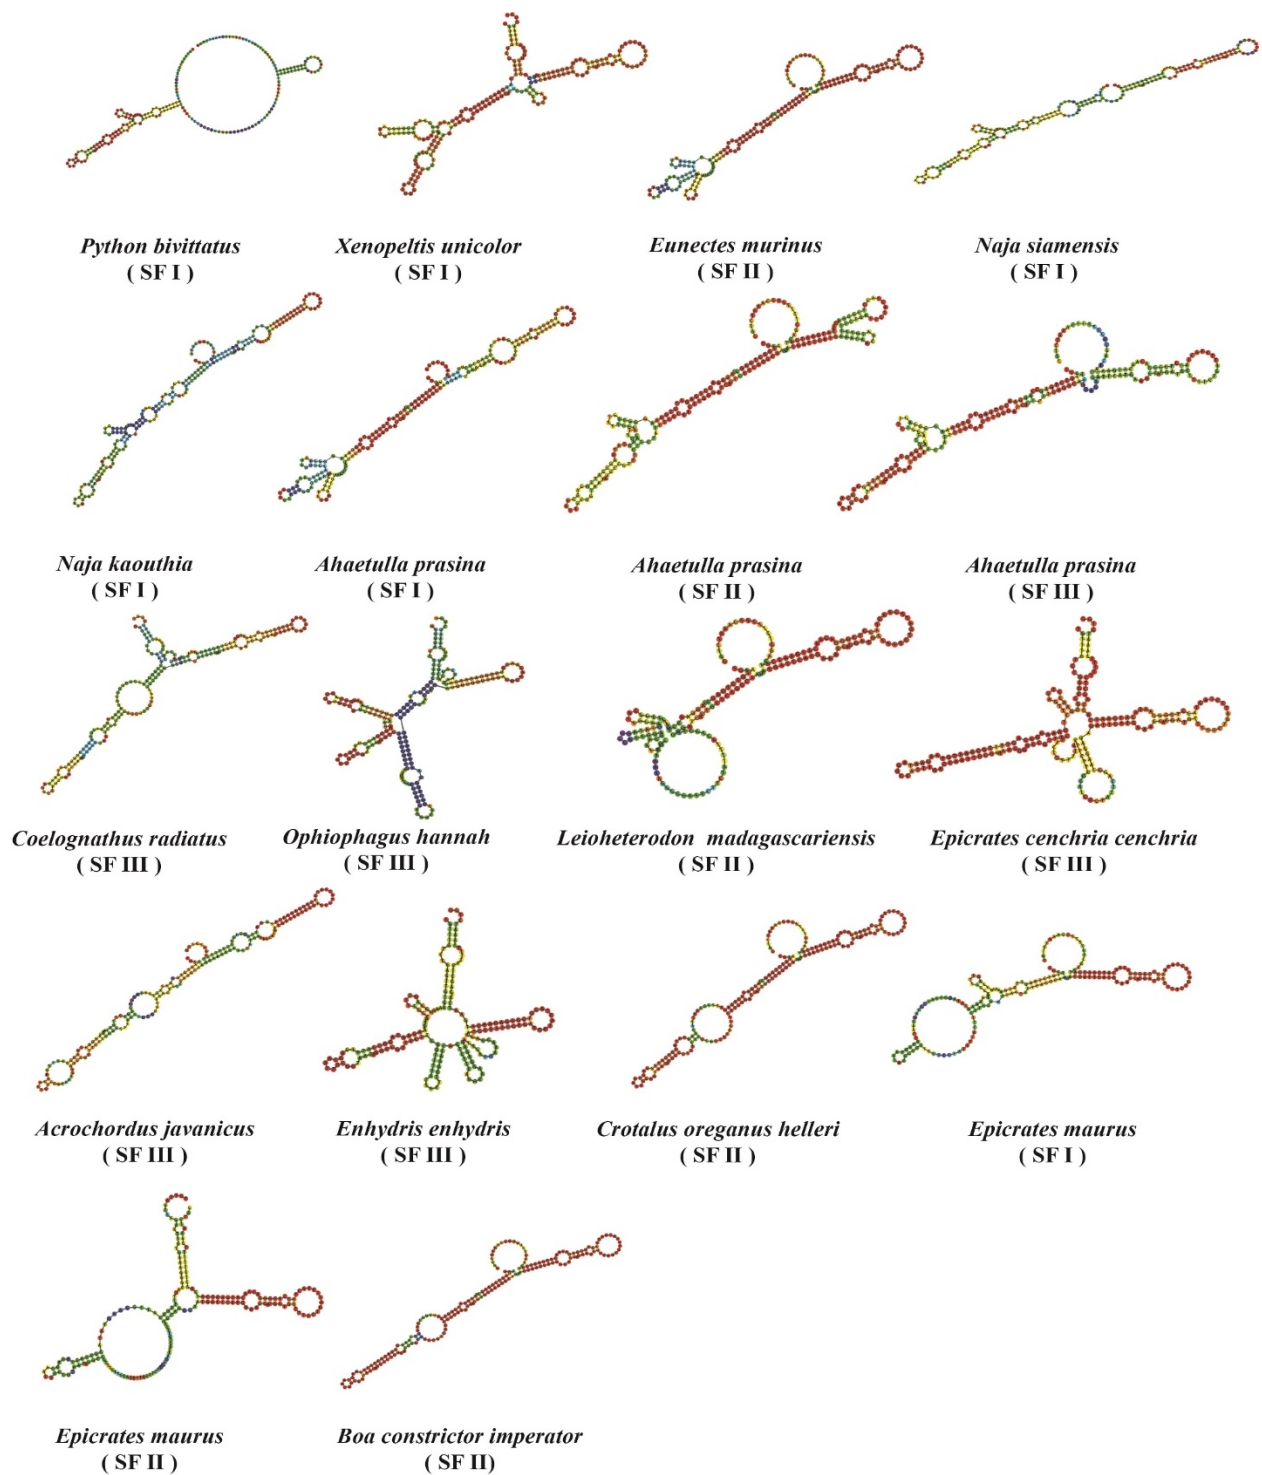

Supplementary Figure 4S (Thongchum et al.)

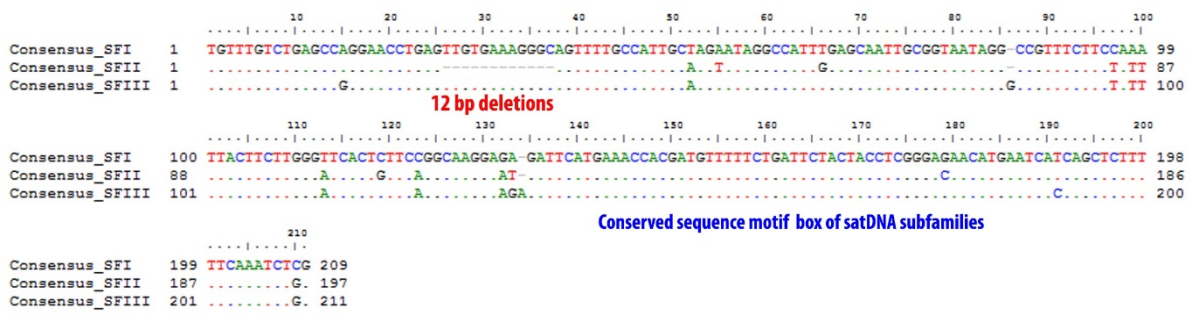

Supplementary Figure 5S (Thongchum et al.)

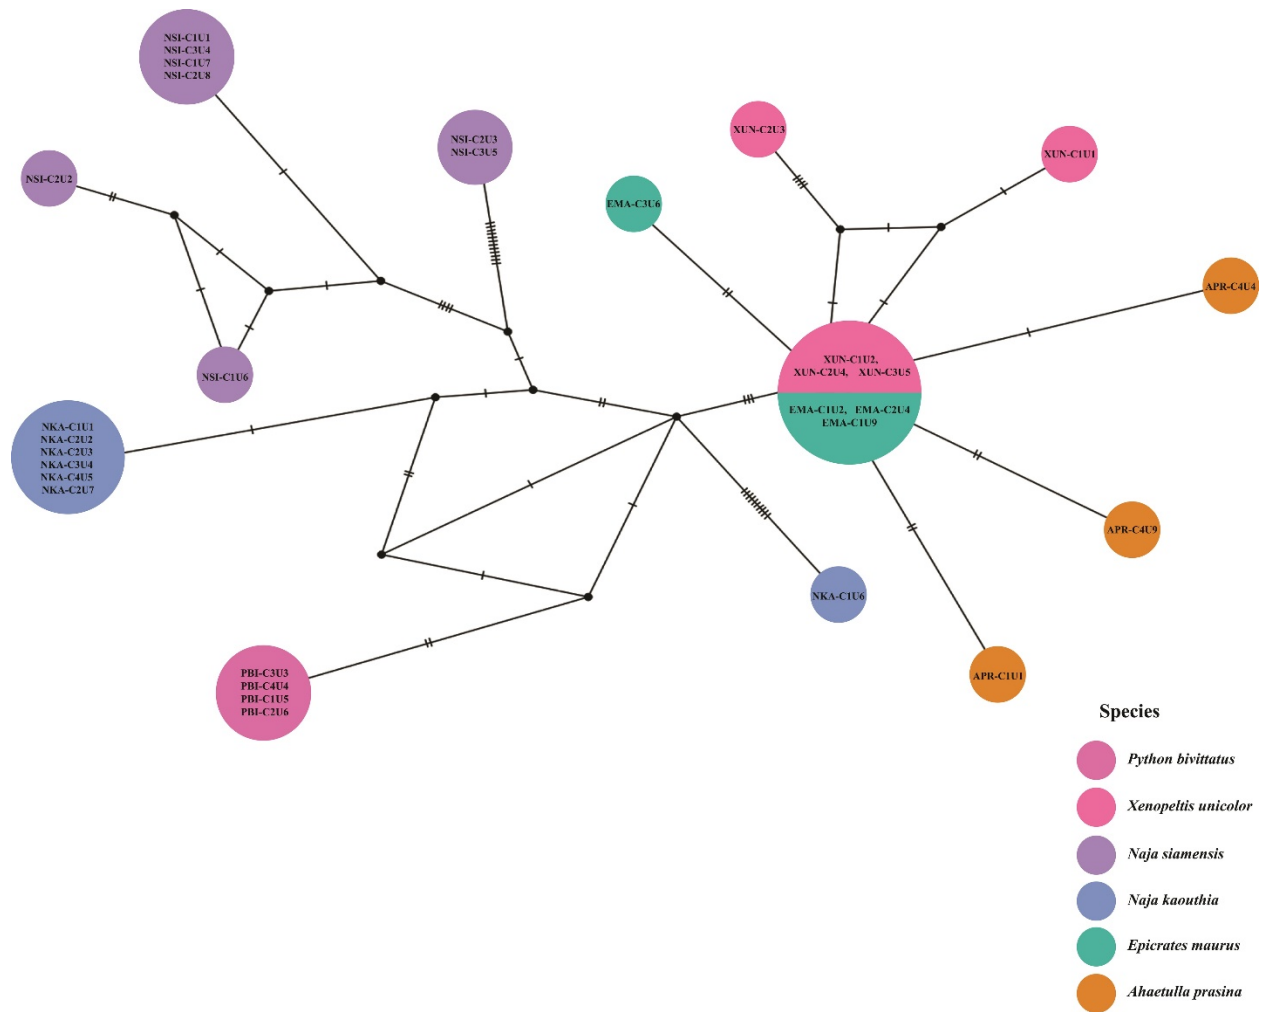

Supplementary Figure 6S (Thongchum et al.)

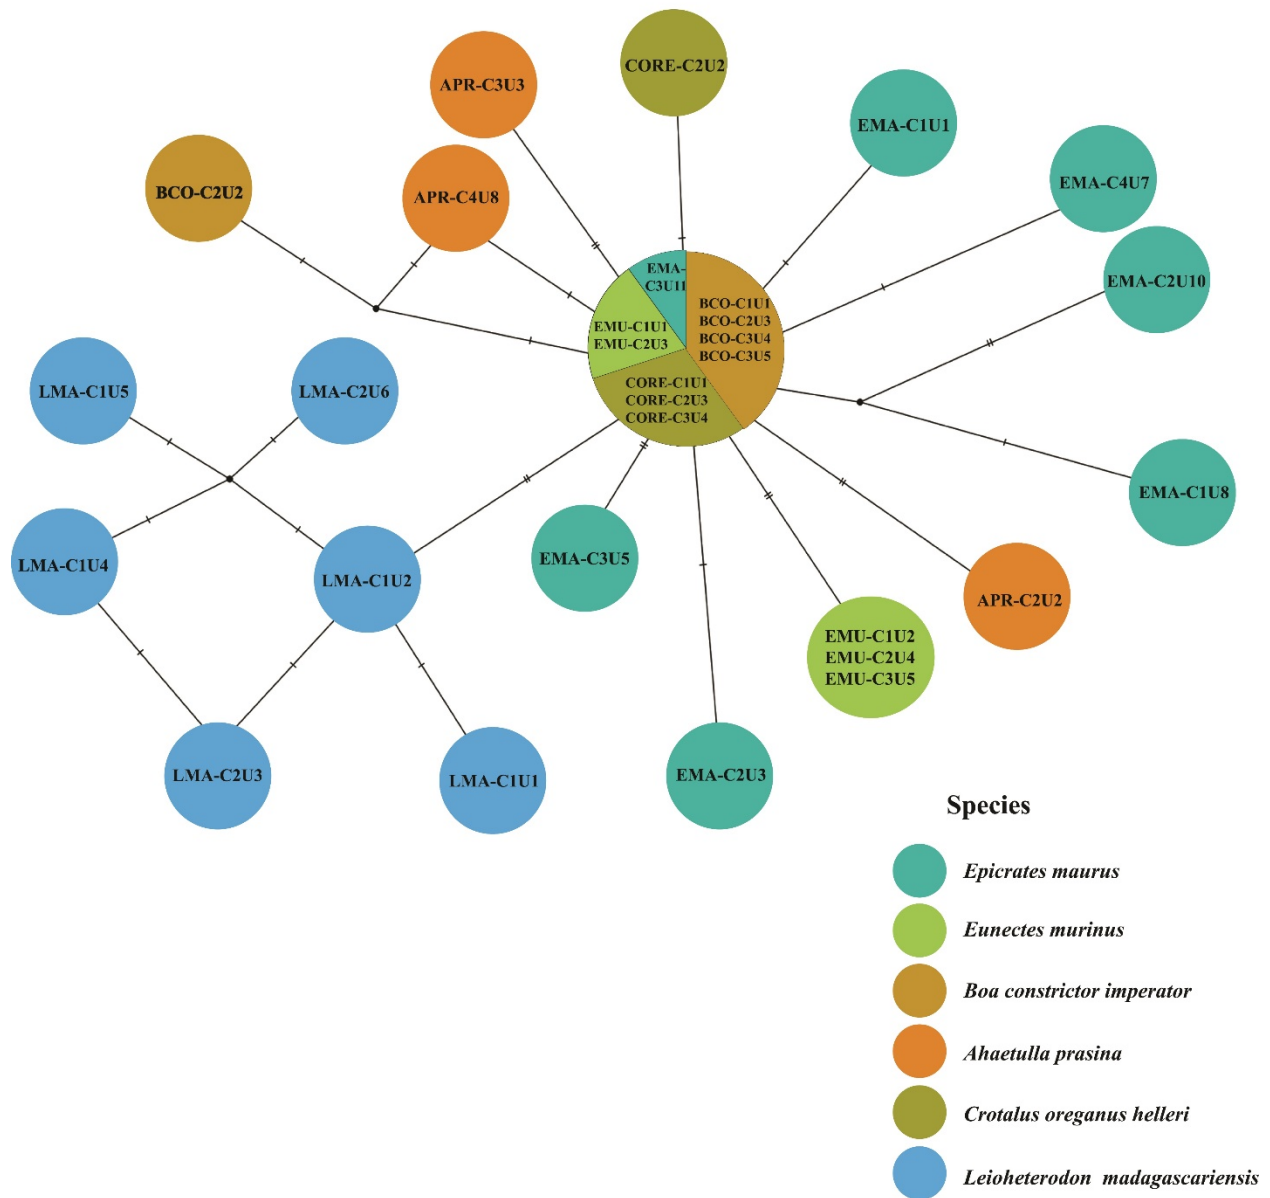

Supplementary Figure 7S (Thongchum et al.)

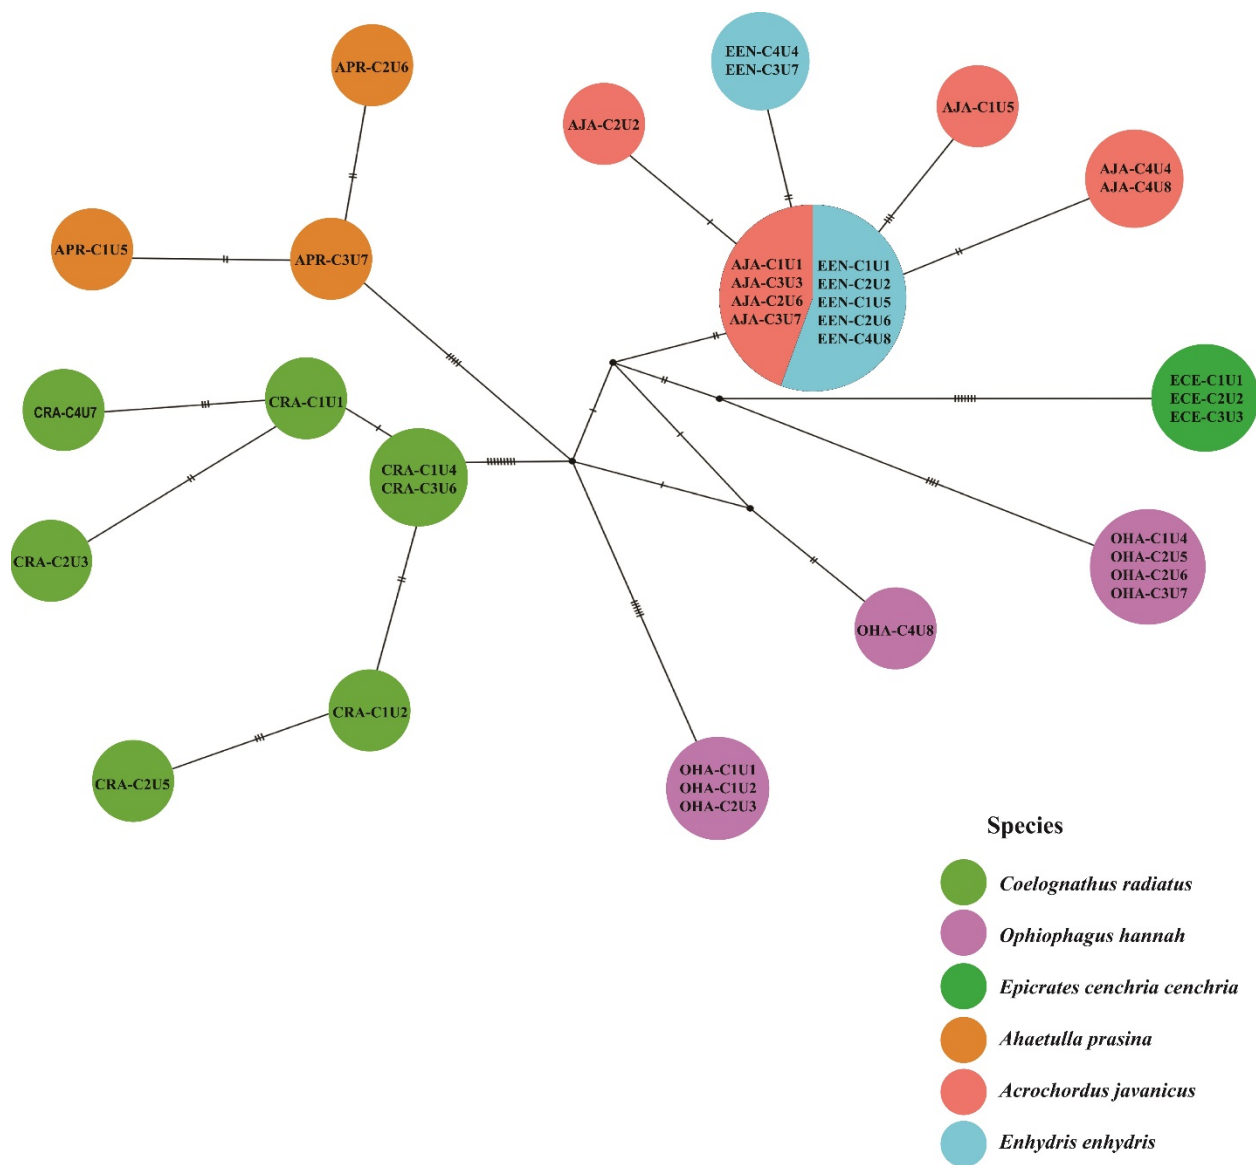

Supplementary Figure 8S (Thongchum et al.)

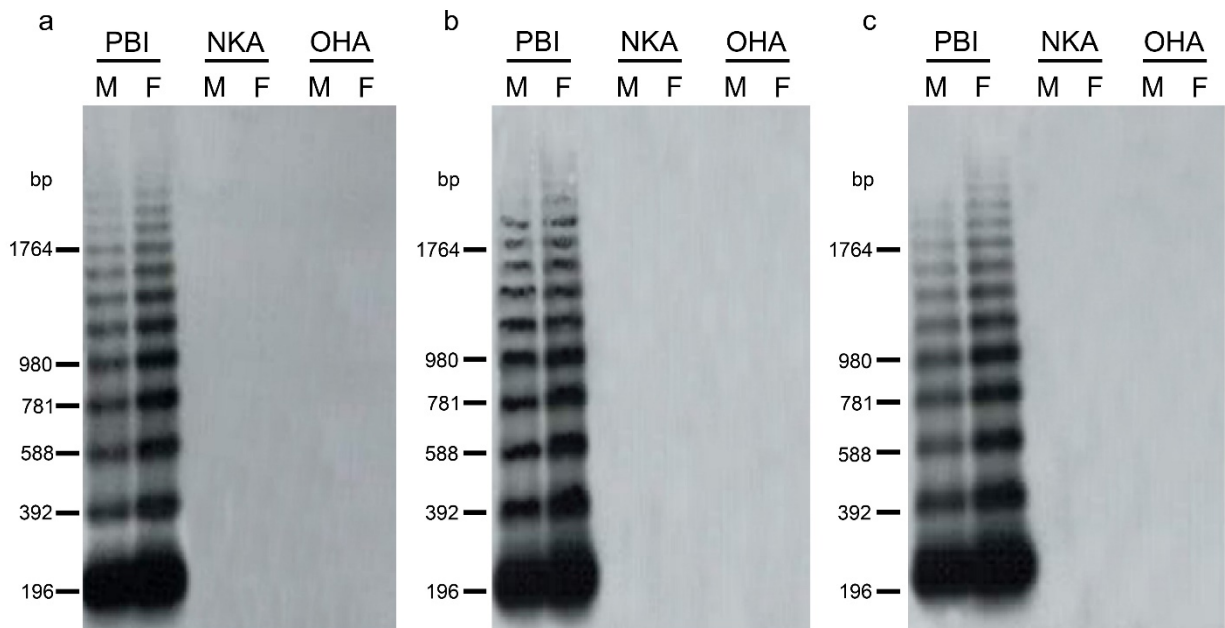

Supplementary Figure 9S (Thongchum et al.)



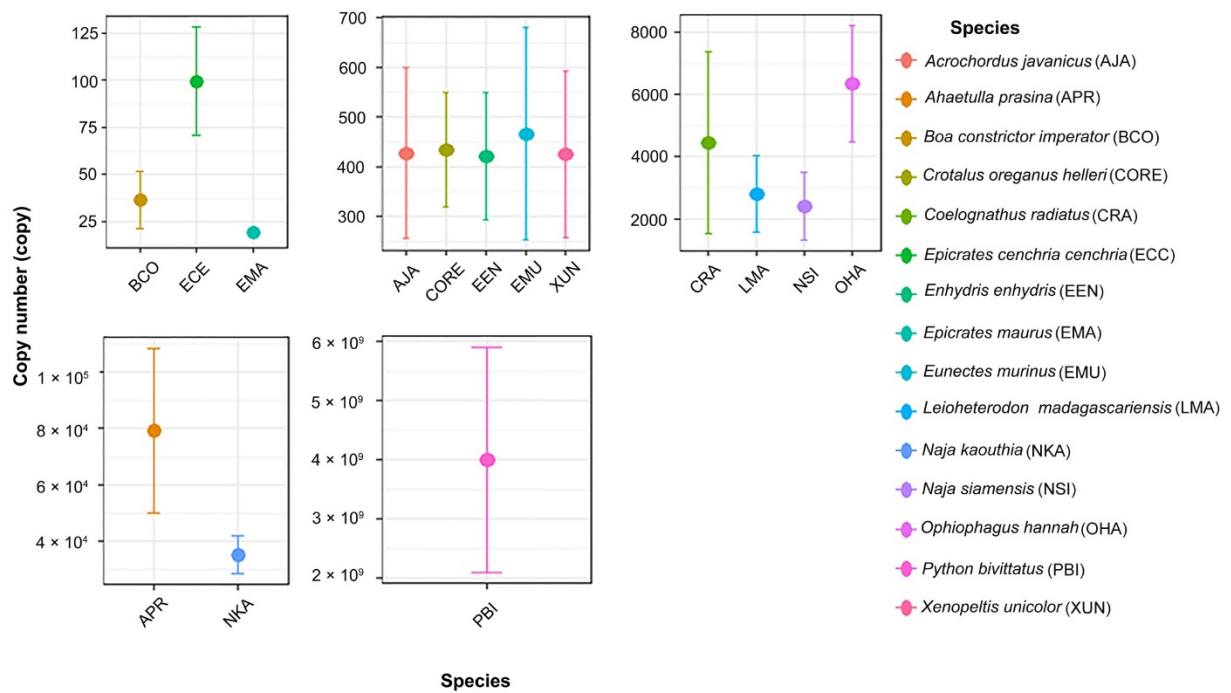

Supplementary Figure 10S (Thongchum et al.)



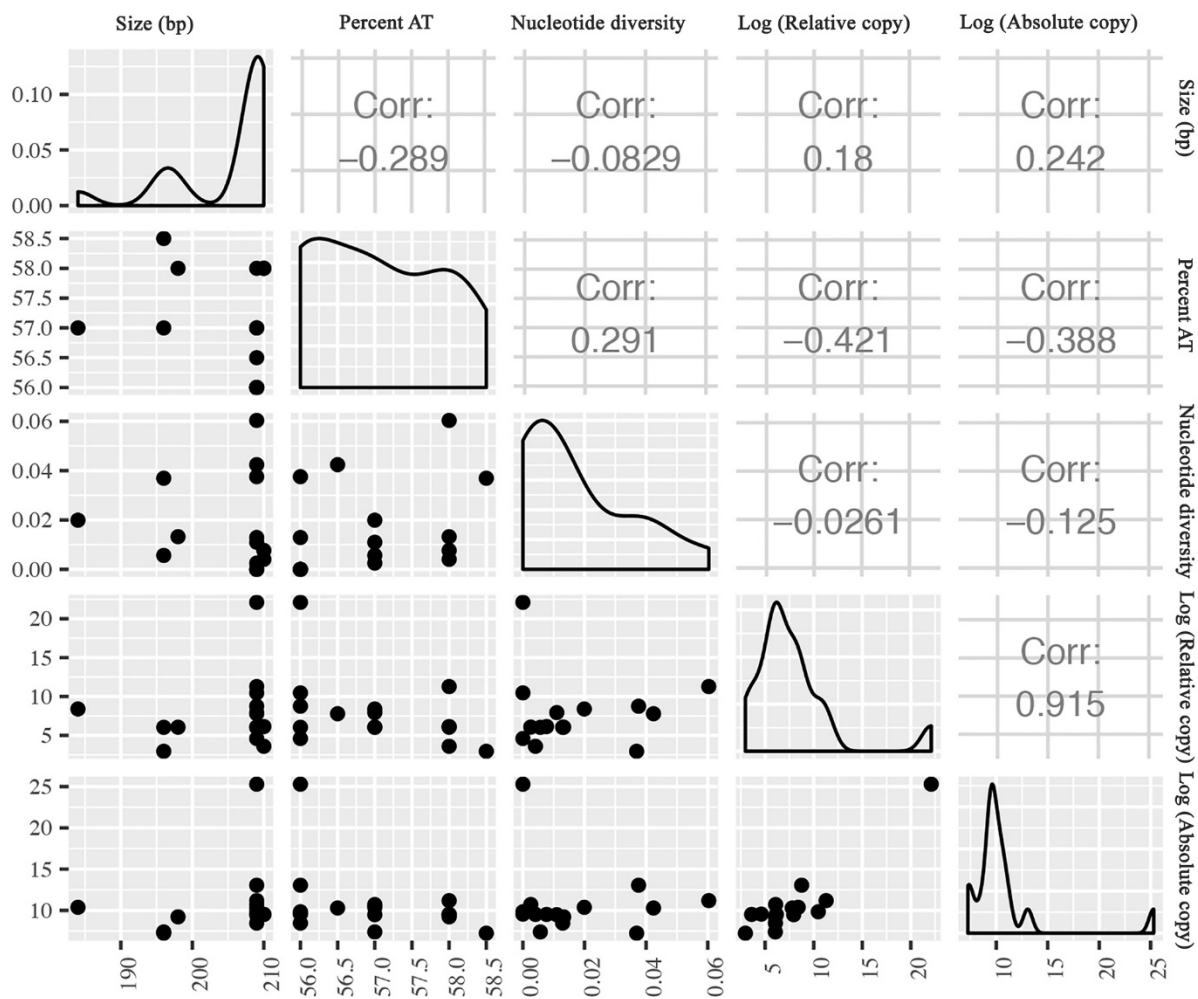

Supplementary Figure 11S (Thongchum et al.)

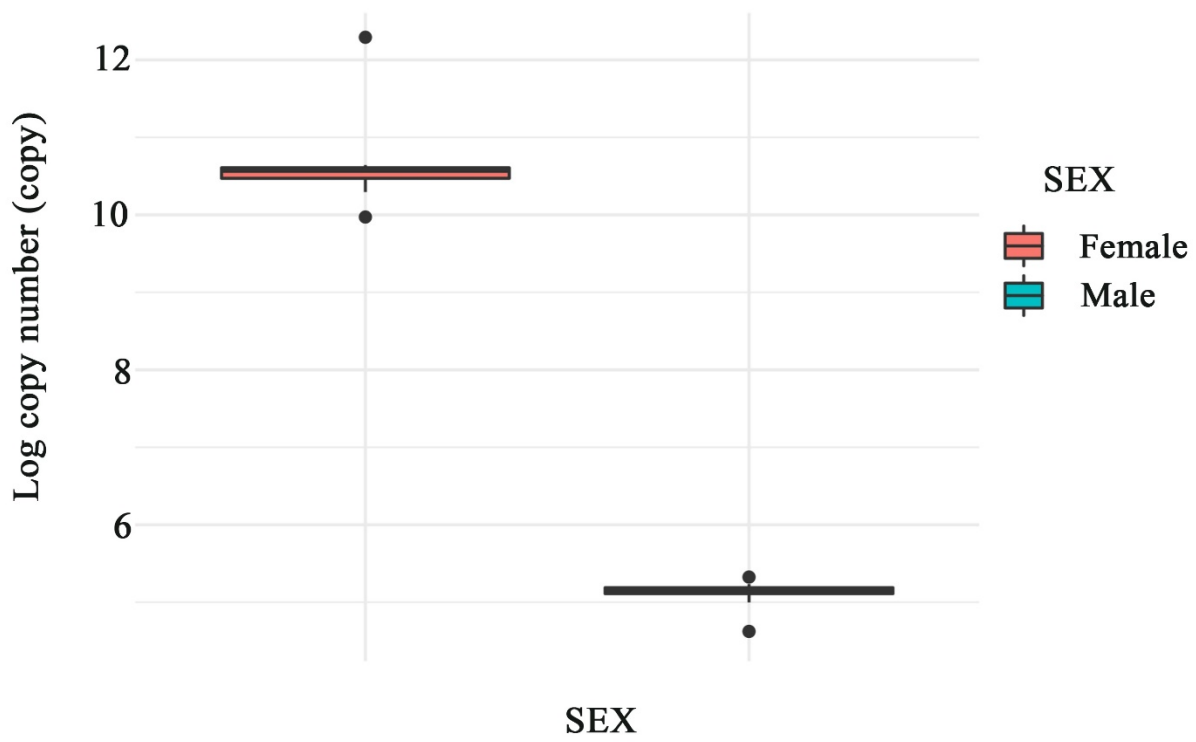

Supplementary Figure 12S (Thongchum et al.)

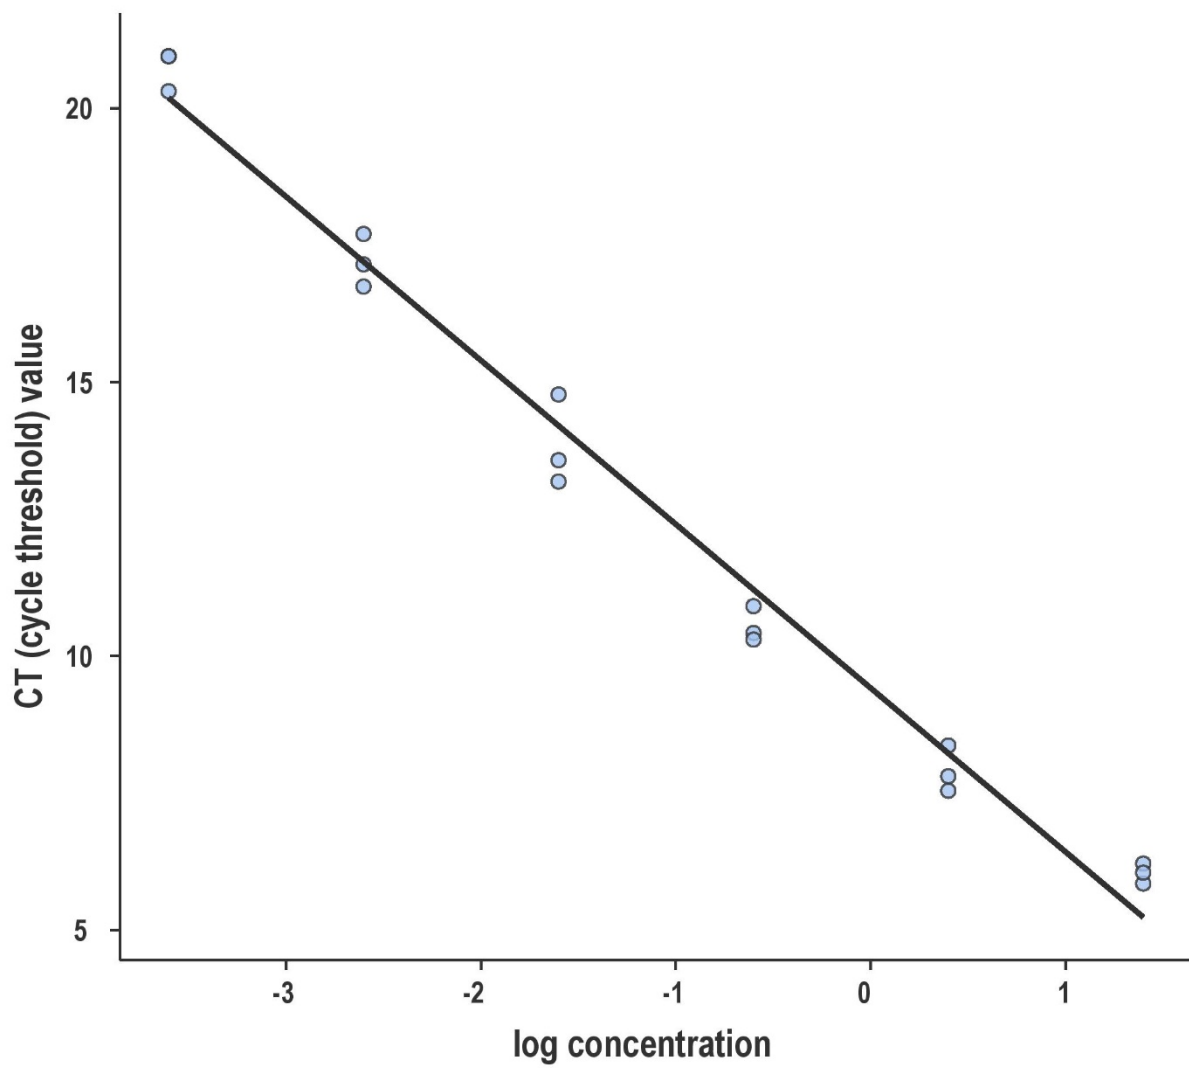

Supplementary Figure 13S (Thongchum et al.)

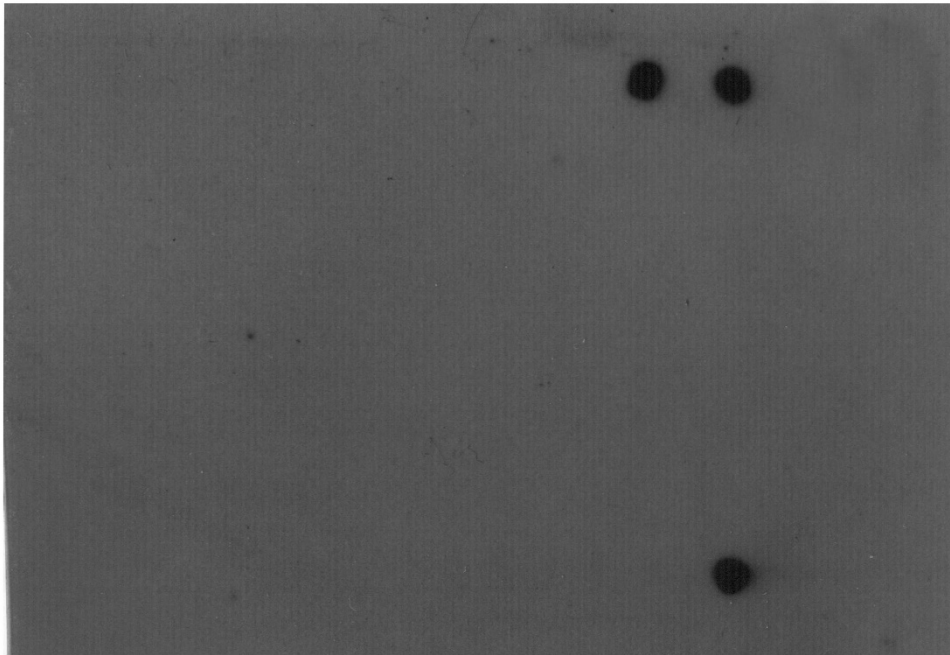

|       |       |        |       |       |       |       |       |        |                    |
|-------|-------|--------|-------|-------|-------|-------|-------|--------|--------------------|
| CRU-M | CRU-F | EMA-M  | EMA-F | XUN-M | XUN-F | PBI-M | PBI-F | AJA-M  | AJA-F              |
| DSI-M | DSI-F | CCE-M  | CCE-F | HBU-M | HBU-F | EEN-M | EEN-F | LMA-M  | LMA-F              |
| PGU-M | PGU-F | NKA-M  | NKA-F | NSI-M | NSI-F | OHA-M | OHA-F | BCA-M  | BCA-F              |
| BFL-M | BFL-F | OFA-M  | OFA-F | APR-M | APR-F | BDE-M | BDE-F | GOX-M  | GOX-F              |
| CFL-M | CFL-F | XRA-M  | XRA-F | CRA-M | CRA-F | PMU-M | PMU-F | EMU-M  | ECE-M              |
| BCO-F | TAL-M | CORE-M | CDU-F | BGA-F | CHO-M | BCY-M | BCO-M | BCYA-M | RNI-M              |
| ANA-F | CPA-F | COR-F  | GPR-F |       |       |       |       |        |                    |
|       |       |        |       |       |       |       |       |        | PBI-DdeI<br>satDNA |

Dot blot hybridization (Original file for Supplementary Fig. 1S)

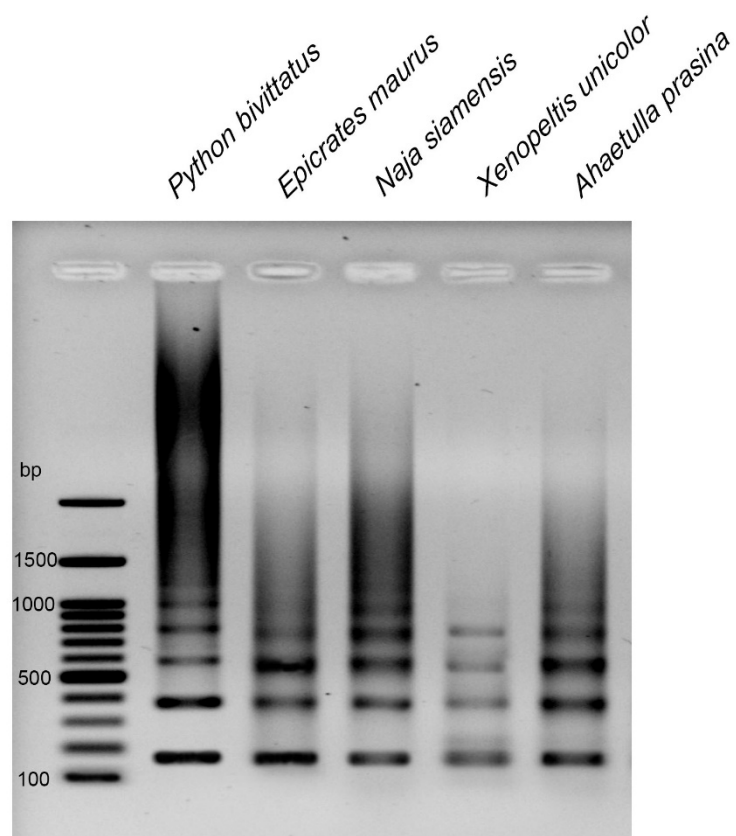

Agarose gel electrophoresis (Original file for Supplementary Fig. 2S)

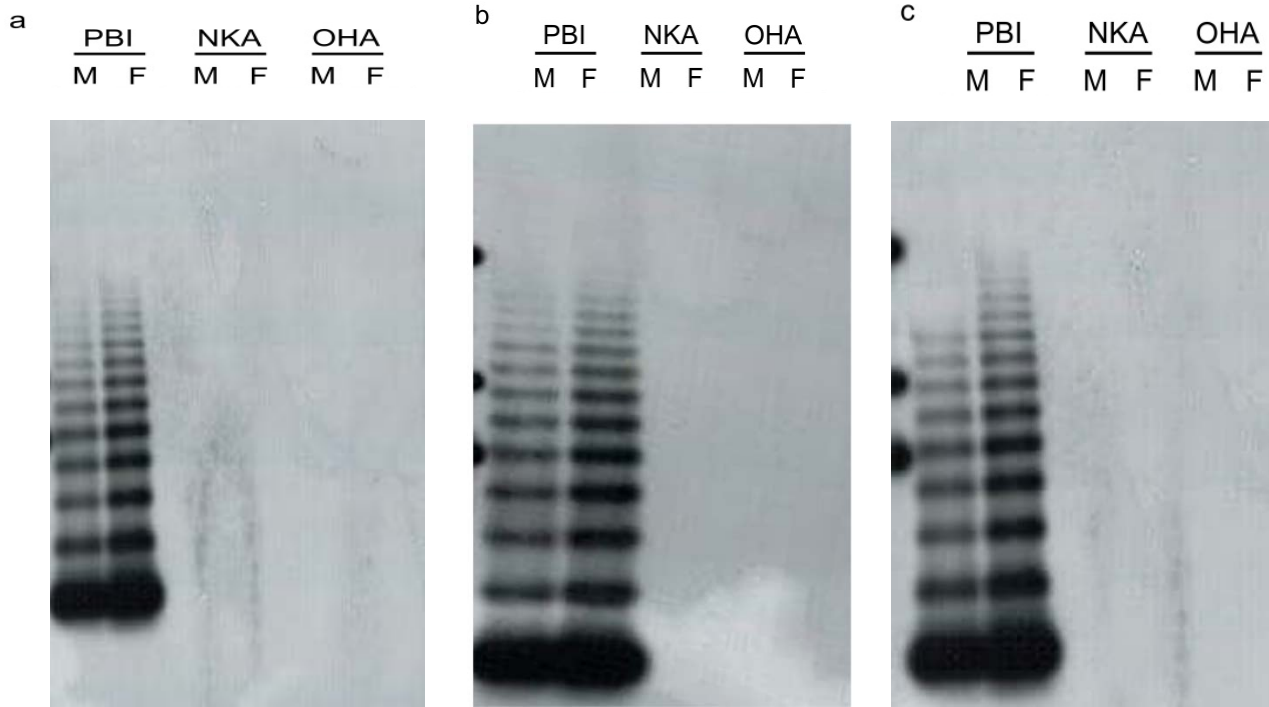

Southern blot hybridization (Original file for Supplementary 9S)
